# Supplementary material
Source: PubMed Central journal article supplement (PMC7042912)
Supplement: jamapediatr-174-419-s001.pdf [file jamapediatr-174-419-s001.pdf]

1 **SUPPLEMENT**

2

3 This supplement contains the following items:

4 1. Original protocol, final protocol, summary of changes

5 2. Original statistical analysis plan, final statistical analysis plan, summary of changes

6

7 **1. Original protocol, final protocol, summary of changes**  
8 **ORIGINAL PROTOCOL**

9 *The following is an English translation of the original protocol in Danish.*

10 Local Ethics Committee: H-B-2009-014; Approved: 23-02-2009  
11 Danish Health and Medicines Authority: 2612-3959; Approved: 23-02-2009  
12 ClinicalTrials.gov: NCT00856947  
13 EudraCT: 2008-007871-26

14 **Aim**

15 To investigate whether supplementation with high-dose vitamin D during third trimester of  
16 pregnancy has a favorable effect on the development of asthma and related disorders in the  
17 offspring.

18 **Hypothesis**

19 High-dose vitamin D<sub>3</sub> supplementation during third trimester of pregnancy will reduce the risk of  
20 developing asthma in the offspring.

21 **Background**

22 Asthma, eczema and allergy are the most common chronic diseases among children and over the  
23 past 40 years, the incidence of these diseases has increased in industrialized countries through yet  
24 unknown factors in the environment.

25 Decreased levels of maternal vitamin D in pregnancy and thereby reduced fetal vitamin D levels in  
26 utero are among the early environmental exposures suspected to have an influence on the increased  
27 incidence of asthma in children.[1] Based on epidemiological studies, a high intake of vitamin D  
28 during pregnancy has been associated with protective effects on asthmatic symptoms in young  
29 children.[2,3] Preliminary results of a newer study indicates twice the risk of asthmatic symptoms in  
30 preschool children with low vitamin D levels at birth compared to children with a high level of  
31 vitamin D levels at birth.[4]

32 The results are consistent with several other studies, which suggest that the population in  
33 westernized countries have a reduced supply and level of vitamin D leading to an increased risk of  
34 various diseases. E.g., vitamin D levels in the fetus has been associated with the development of  
35 schizophrenia, diabetes mellitus and bone development.[5–7] Furthermore, high levels of vitamin D  
36 in adults appears to protect against a number of diseases, including bone diseases and cancer. [8–  
37 10]

38 The reason for these reduced levels of vitamin D may be found in the lifestyle of modern society.  
39 The majority of our vitamin D supply derives from sun exposure, and because of increasing  
40 awareness of harmful effects of sun exposure in relation to skin cancer, our supply of vitamin D has  
41 been markedly reduced. This is a recent development, which has led to the hypothesis that the  
42 current levels of vitamin D is too low according to the level for which we are genetically  
43 programmed.

44 Vitamin D level is however associated with and highly influenced by other factors as well.  
45 Therefore, it is necessary to conduct controlled, blinded studies on the effect of vitamin D  
46 supplementation to provide sufficient basis for future recommendations.  
47

48 **Method and trial procedure**

49 The women are recruited from the COPSAC<sub>2010</sub> cohort; Local Ethics Committee (H-B-2008-093),  
50 Danish Data Protection Agency (2015-41-3696).

51 The study is a double-blinded, placebo-controlled, randomized parallel group design. 800 pregnant  
52 women will be randomized in a 1:1 ratio to intake of either high dose vitamin D supplementation or  
53 placebo according to one of the following regimes:

- 54 1) Placebo (+ guidance in recommended supplement of vitamin D (400 units daily)) or  
55 2) High dose vitamin D supplement (2400units daily) (+ guidance in recommended supplement  
56 of vitamin D (400units daily))

57 The regimes are administered orally as 2 tablets daily.

58 Blinding and randomization are carried out by the Capital Region Pharmacy and stratified  
59 according to treatment group in the fish oil intervention study (ClinicalTrials.gov: NCT00798226).  
60 This allows for equal numbers receiving high dose vitamin D supplementation in both the fish oil  
61 active group and the fish oil placebo group.

62 The intervention is initiated at the beginning of the third trimester (pregnancy week 24) and  
63 continued until 1<sup>st</sup> visit to the COPSAC clinic after birth at week 1-2 postpartum. At the clinical  
64 visit in pregnancy week 24, the women will be provided with the intervention treatment and  
65 interviewed about current daily vitamin D intake and history of diseases likely to influence vitamin  
66 D levels. At pregnancy week 36 adherence to the regime will be assessed by interview at the  
67 COPSAC clinic. Furthermore, the women will be instructed to return the remaining tablets at the  
68 end of the intervention for evaluation of their compliance.

69 At pregnancy week 24 and 1<sup>st</sup> visit after birth a blood sample will be drawn from the mother in  
70 order to measure 25-OH-vitamin D, total calcium, parathyroid-hormone (PTH) and alkaline  
71 phosphatase.

72 **Inclusion criteria**

73 The study population consists of healthy pregnant women and their children participating in the  
74 COPSAC<sub>2010</sub> cohort. Vitamin D supplements are administered during the third pregnancy trimester.  
75 The women will be included in the study independent of residence, age, race and social status  
76 during week 22-26 of pregnancy.  
77

78 **Exclusion criteria**

79 Pregnant women are excluded from the trial, if they carry a disease leading to an increased risk of  
80 potential side effects from high-dose vitamin D supplementation: Endocrinologic disease in the  
81 form of calcium metabolic disorders, parathyroid disease, thyroid disorders or type 1 diabetes;  
82 Tuberculosis; Sarcoidosis or illness requiring chronic treatment with diuretics or heart medications,  
83 including calcium channel blockers or if they have a current intake of vitamin D supplements over  
84 the recommended dose.  
85

86 **Risks and disadvantages:**

87 Known potential adverse effects of vitamin D intoxication is hypercalcemia and accompanying  
88 symptoms such as loss of appetite, nausea, vomiting, weight loss, headache, lethargy, fatigue,  
89 confusion and renal impairment. These side effects are not found by the administration of vitamin D

90 in physiological doses. Vitamin D intoxication occurs only by the intake of very high doses of  
91 Vitamin D (4 times higher doses than administered in our study). In order to avoid administering  
92 vitamin D supplements to women with a high initial level, women with an intake above the  
93 recommended dose in the previous 6 months are excluded. Expected disadvantages related to blood  
94 sample procedures and are temporary in nature without the risk of permanent injury.

95  
96 **Ethical aspects**

97 Oral vitamin D supplement has been shown to be safe and non-toxic in many randomized trials,  
98 including studies involving pregnant women. The risk of adverse effects in the pregnant woman or  
99 the fetus is suspected to be minimal. Based on the previous studies, it is expected that a large  
100 proportion of the participating women will have a daily low Vitamin D level, and thereby vitamin D  
101 supplementation to these women will be a health benefit. The control group receive recommended  
102 dose of vitamin D, and ethical problems in relation to sufficient treatment of the control group is  
103 thereby not a problem.

104 We believe that the study as outlined above is ethically acceptable and randomized trials of vitamin  
105 D supplements are necessary for future recommendations of vitamin D intake.

106  
107

108 **FINAL PROTOCOL**

109 Unique Protocol ID: 2008-007871-26

110 NCT00856947

111

112 Official Title: Vitamin D Supplementation During Pregnancy for Prevention of Asthma in

113 Childhood: An Interventional Trial in the ABC (Asthma Begins in Childhood) Cohort

114

115 Study Start: March 2009

116

117 Human Subjects Review: Board Status: Approved

118 Approval Number: 2612-3959

119

120 **Study Description**

121

122 **Brief Summary:**

123 The aim of this study is to prevent asthma symptoms (recurrent wheeze) in childhood by  
124 supplementation with high dose vitamin D to the mother during pregnancy. Participants are mothers  
125 and children of the ABC (Asthma Begins in Childhood) cohort. Mothers are recruited during  
126 pregnancy and receive daily supplement with 2400 IU of Vitamin D3 or placebo from week 24 of  
127 gestation to 1 week after delivery. In addition all mothers are advised to take the recommended dose  
128 of 400 IU vitamin D daily. The mothers in ABC also participate in an interventional trial with fish  
129 oil supplementation, and the vitamin D randomization is stratified by fish oil treatment group. The  
130 child is followed with acute and planned visits at the research unit, and wheeze is diagnosed  
131 according to predefined algorithms.

132

133 **Arms and interventions:**

134 Active Comparator: Vitamin D

135 Dietary supplement: 2400 IU Vitamin D<sub>3</sub> (2 tablets of 1200 IU) from week 24 of gestation to 1  
136 week after delivery.

137 Dietary Supplement: Cholecalciferol D<sub>3</sub> 2 tablets of 1200 IU daily from week 24 of gestation to 1  
138 week after delivery. Vitamin D from Camette, Denmark

139

140 Placebo Comparator: Placebo

141 Placebo: 2 placebo tablets with no active substance, identical to the active tablets, from week 24 of  
142 gestation to 1 week after delivery

143 Placebo tablet: 2 tablets containing no active substance. Placebo tablets from Camette, Denmark

144

145 **Outcome Measures**

146 **Primary Outcome Measure:**

147 1. Persistent wheeze

148 Age at onset of persistent wheeze diagnosed according to predefined algorithm of recurrent  
149 troublesome lung

150 symptoms, response to treatment and relapse after withdrawal of treatment

151 [Time Frame: 0 to 3 years of age]

152

153 **Secondary Outcome Measure:**

154 2. Infections

155 Main analysis:

156 • Number of lower respiratory tract infections registered in daily diaries

157 Secondary analyses:  
158 • Acute otitis media  
159 • Number of upper respiratory tract infections  
160 • Number of other infections  
161 • Total number of infections  
162 [Time Frame: 0 to 3 years of age]  
163  
164 3. Allergic sensitization  
165 Allergic sensitization at 6 and/or 18 months assessed by skin prick test and specific IgE in blood  
166 [Time Frame: 6 and 18 months of age]  
167  
168 4. Eczema  
169 Age at onset of eczema diagnosed prospectively by research doctors according to predefined  
170 algorithm based upon  
171 Hanifin and Rajka criteria  
172 [Time Frame: 0 to 3 years of age]  
173  
174 5. Mothers levels of 25-OH-Vitamin D, PTH, Calcium, alkaline phosphatase  
175 [Time Frame: 1 week after delivery]  
176  
177 6. Growth  
178 [Time Frame: 0 to 3 years of age]  
179  
180 7. Asthma exacerbations  
181 Age at onset of severe asthma exacerbation diagnosed by predefined criteria of acute severe asthma  
182 requiring oral/  
183 high dose inhaled steroids or acute hospital contact  
184 [Time Frame: 0 to 3 years of age]  
185  
186 8. Neurological development  
187 Main analysis:  
188 • Cognitive development assessed at 2½ years using the cognitive part of Bayley Scales of Infant  
189 and Toddler development, third edition  
190  
191 Secondary analyses:  
192 • Milestone development monitored prospectively by the parents using a registration form based on  
193 The Denver Development Index and WHO milestones registration (combined assessment by  
194 principal component analysis)  
195 • Language development assessed at 1 and 2 years of age with the Danish version of The  
196 MacArthur Bates Communicative Developmental Inventory (CDI)  
197 • The child's general development (language, fine and gross motor, social and problem solving) at 3  
198 years of age assessed with Ages and stages Questioner, third edition (ASQ-3)  
199 [Time Frame: 0-3 years]  
200  
201 9. Growth  
202 Main analysis:  
203 • Body composition (fat mass and bone mineral density) assessed by DEXA scan at 3 years of age  
204 Secondary analysis

205 • Development of BMI from birth to 3 years assesses longitudinally in the research clinic  
206 [Time Frame: 0-3 years]

207

208 10. Systemic immune status

209 Main analysis Immune status at 18 months measured in stimulated whole blood as cytokine release  
210 (combined assessments by principal component analyses)

211 Secondary analyses Composition of immune cell subsets in whole blood at birth and at 18 months  
212 of age

213 [Time Frame: 18 months]

214

215 11. Airway mucosal immune status

216 Immune status measured in airway mucosal lining fluid at 4 weeks and 2 years of age (combined  
217 assessments by

218 principal component analyses for each age point)

219 [Time Frame: 4 weeks and 2 years]

220

221 12. 17q21 genotype and sphingolipid metabolites

222 In a secondary analyses, we will determine the effect of 17q21 genotype on the efficacy of vitamin  
223 D supplementation in the prevention of asthma/wheeze. We will compute hazard ratios for the  
224 reduction in asthma/wheeze risk associated with prenatal supplementation, stratified by rs12936231.  
225 rs12936231 is a functional SNP influencing expression of ORMDL3, and given the role of  
226 ORMDL3 as a key sphingolipid biosynthesis regulator, we will subsequently investigate the relative  
227 abundance of sphingolipids between those in the vitamin D Intervention arm and those in the  
228 placebo group, stratified by 17q21 genotype. Finally we will identify interactions between prenatal  
229 vitamin D supplementation, rs12936231 genotype and sphingolipid metabolism in the risk of  
230 asthma/wheeze by age three.

231 [Time Frame: 6 months]

232

233 13. Dental health

234 Caries and enamel defects (molar incisor hypomineralization, MIH) determined at a dental  
235 examination at age 6 years.

236 [Time Frame: 6 year]

237

238 Other Pre-specified Outcome Measures:

239 14. Asthma

240 Asthma diagnosed from age 3 to 10 years based on the same predefined algorithm of recurrent  
241 troublesome lung symptoms, response to treatment after withdrawal of treatment, which was used  
242 for persistent wheeze at age 0-3 in phase 1 of the study. Primary outcome in phase 2 is current  
243 asthma at specific visits till age 10 years, which is diagnosed in children fulfilling the persistent  
244 wheeze algorithm at any point during the first 10 years of life and still needing inhaled  
245 corticosteroids at specific visits (3, 4, 5, 6, 8 and 10 years of age) to control the symptoms.

246

247 Asthma exacerbations:

248 Age at onset and number of severe asthma exacerbation diagnosed by predefined criteria of acute  
249 severe asthma requiring oral/ high dose inhaled steroids or acute hospital contact

250 [Time Frame: 3-10 years of age]

251

252 15. Lung function measurements

253 Spirometry measuring airflow assessed by FEV1, MMEF and FEV1/FVC ratio at age 5, 6, 8 and 10  
254 years and airway resistance (sRaw) measured by plethysmography at age 3, 4, 5, 6, 8 and 10 years.  
255 Multiple breath wash-out using SF6 and N2 as inert gasses to determined LCI, Scond and Sacin at  
256 ages 3, 4 and 5 years.

257 Bronchial reactivity: [Time Frame: at 6 years of age] Provocative dose of methacholine leading to a  
258 20% drop in FEV1 from baseline (PD20 value) at age 6 years.

259 Airway inflammation: [Time Frame: 6-10 years of age] Measurement of fractional exhaled nitric  
260 oxide (FeNO) at age 6, 8 and 10 years  
261 [Time Frame: 3-10 years of age]

262

## 263 16. Infections

264 Prescribed medicine for infections. Types and length of infections  
265 [Time Frame: 3-10 years of age]

266

## 267 17. Growth

### 268 Anthropometrics:

269 Clinical follow up on the development of weight in kg (calibrated digital weight scales), height in  
270 cm (Harpenden stadiometer), waist-, thorax- and head circumference in cm (using tape; 3 times  
271 each) at every visit till age 10 years assessed longitudinally in the research clinic.

272

### 273 Body composition:

274 Body composition measured as fat mass, lean mass, bone mineral content (BMC) and bone mineral  
275 density assessed (BMD) by DXA scans at 6 years of age.

276 Body impedance measurements at 10 years of age.

277 [Time Frame: 3- 10 years of age]

278

## 279 18. Cognitive function

280 The following cognitive functions will be covered by paper-and-pencil-tests:

- 281 • The verbal memory.
- 282 • The Vocabulary and Matrices subtests from (WISC-IV) to estimate intelligence.
- 283 • Verbal working memory.
- 284 • Processing speed.
- 285 • Mental flexibility..
- 286 • Fine motor dexterity will be assessed with the Grooved Pegboard Test

287

288 The following cognitive functions will be assessed using the Cambridge Neuropsychological Test

289 Automated Battery subtests:

- 290 • Sensorimotor functioning.
- 291 • Mental response speed and motor speed will be assessed with the Reaction Time task;
- 292 • Working memory capacity.
- 293 • Working memory and strategy formation.
- 294 • Attentional set formation, maintenance, shifting, and flexibility of attention.
- 295 • Response inhibition.
- 296 • Visual learning and memory.
- 297 • Sustained attention.
- 298 • Facial affect recognition.

299 [Time Frame: 10 years of age]

300



301 19. Behavioral and psychopathological dimensions.  
302 Questionnaires will be administered to the parents. ADHD-RS questionnaire at 8 and 10 years of  
303 age. Strength and Difficulties Questionnaire (SDQ) at 6, 8 and 10 years of age. Social Responsive  
304 Scale, Second version (SRS-2) at 10 years of age. The Behavior Rating Inventory of Executive  
305 Function 2nd edition (BRIEF-2) at 10 years of age. The Child Behavior Checklist school-age  
306 version (CBCL) at 10 years of age. Behavioral and psychopathological dimensions will be assessed  
307 at 10 years of age with the semi-structured clinical interview Schedule for Affective Disorders and  
308 Schizophrenia for School-Age Children - Present and Lifetime Version (K-SADS-PL) first with a  
309 parent and next with the child.

310 The child assessor will rate potential behavioral and emotional problems observed during the  
311 cognitive test session using the Test Observation Form (TOF).

312 The Magical Thinking Questionnaire (MTQ) will be given to the child.

313 [Time Frame: 6- 10 years of age]

314

315 20. MRI scanning of the Brain

316 Following technics will be used. Structural MRI scanning to distinguish between grey and white  
317 matter. Diffusion weighted imaging to register the fiber directions in the brain. Magnetisation  
318 transfer imaging to measure the magnetisation transfer ratio reflecting the interaction between  
319 macromolecular protons and the free water protons of tissue, and this technique in addition to  
320 quantitative T1-mapping will be used to assess myelination in the developing brain.

321 Magnetic resonance spectroscopy (MRS) allows for non-invasive measurement of metabolites.

322 Phase-contrast MR angiography to detect the total cerebral blood flow. Arterial spin labelling to  
323 measure cerebral blood perfusion.

324 [Time Frame: 10 years of age]

325

326 21. Eczema

327 Age at onset of eczema diagnosed prospectively by research doctors according to predefined  
328 algorithm based upon Hanifin and Rajka criteria and severity determined by SCORAD score. In  
329 phase 2 current eczema at specific visits till age 10 years will be evaluated.

330 [Time Frame: 3-10 years of age]

331

332 22. Allergic sensitization/atopy

333 Allergic sensitization at 6 and 10 years of age assessed by skin prick test (ALK-Abelló, Denmark)  
334 and specific IgE in blood (ImmunoCAP, PHarmacia Diagnostics AB, Sweden) and total-IgE level  
335 and blood eosinophil count measured at the same timepoints.

336 [Time Frame: 3-10 years of age]

337

338 23. Airway mucosal immune status

339 Immune status measured in airway mucosal lining fluid at 3, 6 and 10 years of age (combined  
340 assessments by principal component analyses for each age point).

341 [Time Frame: 3-10 years of age]

342

343 24. allergic rhinitis

344 Allergic sensitization combined with symptom recording of troublesome congestion or sneezing or  
345 runny nose upon relevant exposure to allergens at age 3, 4, 5, 6, 8 and 10 years.

346 [Time Frame: 3-10 years of age]

347

348

349 Overview of clinical tests; phase 2:

| <b>Children</b>                      | <b>4 years</b> | <b>5 years</b> | <b>6 years</b> | <b>Investigations of biologic material</b>            |
|--------------------------------------|----------------|----------------|----------------|-------------------------------------------------------|
| Airway and eczema diary              | x              | x              | x              |                                                       |
| Doctor examination                   |                |                | x              |                                                       |
| Tympanometry                         |                |                | x              |                                                       |
| Blood pressure                       |                |                | x              |                                                       |
| Growth details                       | x              | x              | x              |                                                       |
| Nose filter                          |                |                | x              | Immune system                                         |
| Electronic nose measure              |                |                | x              | Exhaled air                                           |
| Urine sample                         |                |                | x              | Interleukins, leukotrienes and metabolic products     |
| Blood sample                         |                |                | x              | Immune system, epigenetics and metabolic product      |
| Skin prick test                      |                |                | x              | Allergy                                               |
| Hair sample                          |                |                | x              | Cotinine (nicotine product)                           |
| Faeces sample                        | x              | x              | x              | Microbiological colonization                          |
| Skin swab                            |                |                | x              | Microbiological colonization                          |
| Throat swab                          |                |                | x              | Microbiological colonization                          |
| Nasal scrape*                        |                |                | x              | mRNA - gene expression                                |
| Activity measure                     |                |                | x              |                                                       |
| DXA scan                             |                |                | x              | Lean mass, fat mass and bone mineral content/ density |
| Spirometry                           |                |                | x              |                                                       |
| Bodybox                              | x              |                | x              |                                                       |
| Multiple breath washout              | x              |                | x              |                                                       |
| Metacholine provocation*             |                |                | x              |                                                       |
| FeNO measure*                        |                |                | x              |                                                       |
| Child Behavior Checklist*            |                |                | x              | Mentality and behavior                                |
| <b>Parents</b>                       |                |                |                |                                                       |
| Interview - child environment        | x              | x              | x              |                                                       |
| Interview - child asthma and allergy | x              | x              | x              |                                                       |

350

351

352 \*New tests

353

354 **SUMMARY OF CHANGES**

355 Changes to the original protocol are indicated in <https://clinicaltrials.gov/ct2/show/NCT00856947>.

356

357 Briefly, these encompass introduction of novel assessments, including neurological development,  
358 growth, systemic immune status and airway mucosal immune status.

359

360 Growth: Dual X-ray Absorptiometry (DXA) scans are performed to measure the child's pre- and  
361 postnatal factors which play a role in the development of lean mass, fat mass and bone  
362 mineralization. The prevalence of obesity and osteoporosis is a growing epidemic in the Western  
363 societies and adult obesity is associated with growth in childhood<sup>11,12</sup>. Despite osteoporosis being  
364 characterized as a condition among the elderly population it is well-known that predisposition  
365 occurs during childhood<sup>13,14,15</sup>. Therefore, we examine the children's growth and bone  
366 mineralization, and the key factors influencing these outcomes.

367 **Reference List**

368 1 Litonjua AA, Weiss ST. Is vitamin D deficiency to blame for the asthma epidemic? *J Allergy*  
369 *Clin Immunol* 2007;**120**:1031–5. doi:10.1016/j.jaci.2007.08.028

370 2 Devereux G, Litonjua AA, Turner SW, *et al*. Maternal vitamin D intake during pregnancy and  
371 early childhood wheezing. *Am J Clin Nutr* 2007;**85**:853–9.

372 3 Camargo CA, Rifas-Shiman SL, Litonjua AA, *et al*. Maternal intake of vitamin D during  
373 pregnancy and risk of recurrent wheeze in children at 3 y of age. *Am J Clin Nutr* 2007;**85**:788–  
374 95.

375 4 Camargo CA, Ingham T, Wickens K, *et al*. Cord-Blood 25-Hydroxyvitamin D Levels and Risk  
376 of Respiratory Infection, Wheezing, and Asthma. *Pediatrics* 2011;**127**:e180–7.  
377 doi:10.1542/peds.2010-0442

378 5 McGrath J, Selten J-P, Chant D. Long-term trends in sunshine duration and its association with  
379 schizophrenia birth rates and age at first registration — data from Australia and the  
380 Netherlands. *Schizophr Res* 2002;**54**:199–212. doi:10.1016/S0920-9964(01)00259-6

381 6 Hyppönen E, Läärä E, Reunanen A, *et al*. Intake of vitamin D and risk of type 1 diabetes: a  
382 birth-cohort study. *The Lancet* 2001;**358**:1500–3. doi:10.1016/S0140-6736(01)06580-1

383 7 Javaid M, Crozier S, Harvey N, *et al*. Maternal vitamin D status during pregnancy and  
384 childhood bone mass at age 9 years: a longitudinal study. *The Lancet* 2006;**367**:36–43.  
385 doi:10.1016/S0140-6736(06)67922-1

386 8 Bischoff-Ferrari HA, Giovannucci E, Willett WC, *et al*. Estimation of optimal serum  
387 concentrations of 25-hydroxyvitamin D for multiple health outcomes. *Am J Clin Nutr*  
388 2006;**84**:18–28.

389 9 Holick MF. Vitamin D deficiency. *N Engl J Med* 2007;**357**:266–81.  
390 doi:10.1056/NEJMra070553

- 391 10 Adams JS, Clemens TL, Parrish JA, *et al.* Vitamin-D Synthesis and Metabolism after  
392 Ultraviolet Irradiation of Normal and Vitamin-D-Deficient Subjects. *N Engl J Med*  
393 1982;**306**:722–5. doi:10.1056/NEJM198203253061206
- 394 11 Chomtho S, Wells JC, Williams JE, Davies PS, Lucas A, Fewtrell MS. Infant growth and later  
395 body composition:  
396 evidence from the 4-component model. *Am J Clin Nutr* 2008; 87(6):1776-1784.  
397
- 398 12 Stettler N, Zemel BS, Kumanyika S, Stallings VA. Infant weight gain and childhood  
399 overweight status in a  
400 multicenter, cohort study. *Pediatrics* 2002; 109(2):194-199.  
401
- 402 13 Javaid MK, Cooper C. Prenatal and childhood influences on osteoporosis. *Best Pract Res Clin*  
403 *Endocrinol Metab*  
404 2002; 16(2):349-367.  
405
- 406 14 Carrie Fassler AL, Bonjour JP. Osteoporosis as a pediatric problem. *Pediatr Clin North Am*  
407 1995; 42(4):811-824.  
408
- 409 15 Eisman JA, Kelly PJ, Morrison NA *et al.* Peak bone mass and osteoporosis prevention.  
410 *Osteoporos Int* 1993; 3  
411 Suppl 1:56-60.  
412  
413  
414

415

## 416 2. Original statistical analysis plan, final statistical analysis plan, summary of changes

### 417 ORIGINAL STATISTICAL ANALYSIS PLAN

#### 418 Outcome definitions:

##### 419 Primary outcome

420 Persistent wheeze: Age at onset of persistent wheeze diagnosed according to a predefined algorithm  
421 of recurrent troublesome lung symptoms, response to treatment and relapse after withdrawal of  
422 treatment

423

##### 424 Secondary outcomes

425 Asthma exacerbations: Age at onset of severe asthma exacerbations diagnosed by predefined  
426 criteria of acute severe asthma requiring oral/high dose inhaled steroids or acute hospital contact

427

428 Eczema: Age at onset of eczema diagnosed prospectively by research doctors according to  
429 predefined algorithm based upon Hanifin and Rajka criteria

430

431 Allergic sensitization: Allergic sensitization at 6 and/or 18 months of age assessed by skin prick test  
432 and specific IgE in blood

433

434 Infections: Main analysis: Number of lower respiratory tract infections registered in daily diaries

435 Secondary analyses: Acute otitis media, number of upper respiratory tract infections, number of  
436 other infections, total number of infections

437 Mothers levels of 25-OH-Vitamin D, PTH, Calcium, alkaline phosphatase

438

439 Growth: Anthropometric measurements in the clinic.

440 Body composition (fat mass and bone mineral density) assessed by DXA scan at 3 years of age

441 Development of BMI from birth to 3 years assessed longitudinally in the research clinic

442

#### 443 Statistical analyses:

444 The effect of high-dose Vitamin D<sub>3</sub> supplementation on age at onset of persistent wheeze, lower  
445 respiratory infections, and eczema is analyzed by Cox proportional hazards regression, where p-  
446 values correspond to Wald tests. The children are retained in the model from birth until age of  
447 diagnosis, drop out, or age at their last clinic visit before the RCT was unblinded.

448 The effect of Vitamin D<sub>3</sub> supplementation on the cross-sectional end-points asthma and allergic  
449 sensitization is analyzed by logistic regression, whereas the effect on number of wheezy episodes  
450 and upper respiratory infections is analyzed by a generalized estimating equation (GEE) Poisson  
451 regression model.

452 The effect on airway immunology is analyzed by calculating geometric mean ratios of each  
453 mediator in the high-dose Vitamin D<sub>3</sub> vs. control group and by a principal component analysis  
454 (PCA) capturing the overall immunological trends in the data and their relation to the intervention  
455 analyzed by Wilcoxon rank sum test. Initially, the mediator levels were log-transformed. Prior to  
456 the PCA the variables were scaled to unit variance.

457 The primary analysis of persistent wheeze is presented crude and adjusted for sex, birth season,  
458 maternal Vitamin D level at randomization, and the n-3 LCPUFA RCT.

459 A significance level of 0.05 is used in all types of analyses.

460

461 Additional secondary endpoints:

462 The novel assessments introduced in the cohort resulted in additional secondary end-points:

463

464 Airway mucosal immune status

465 Description: Immune status measured in airway mucosal lining fluid at 4 weeks and 2 years of age

466 (combined assessments by principal component analyses for each age point)

467 Systemic immune status

468 Description:

469 Main analysis: Immune status at 18 months measured in stimulated whole blood as cytokine release

470 (combined assessments by principal component analyses)

471 Secondary analysis: Composition of immune cell subsets in whole blood at birth and at 18 months

472 of age

473 Neurological development 0-3 years

474 Description:

475 Main analysis: Cognitive development assessed at 2½ years using the cognitive part of Bayley

476 Scales of Infant and Toddler Development, third edition

477 Secondary analyses: 1) Milestone development monitored prospectively by the parents using a

478 registration form based on The Denver Development Index and WHO milestones registration

479 (combined assessment by principal component analysis); 2) Language development assessed at 1

480 and 2 years of age with the Danish version of The MacArthur Bates Communicative Developmental

481 Inventory (CDI); 3) The child's general development (language, fine and gross motor, social and

482 problem solving) at 3 years of age assessed with Ages and stages Questioner, third edition (ASQ-3)

483 Growth:

484 Body composition: Body composition measured as fat mass, lean mass, bone mineral content

485 (BMC) and bone mineral density assessed (BMD) through DXA scans at 6 years of age.

486 Anthropometrics: Clinical follow up on the development of weight in kg (calibrated digital weight

487 scales), height in cm (Harpenden stadiometer), waist-, thorax- and head circumference in cm (using

488 tape; 3 times each) at every visit till age 10 years assessed longitudinally in the research clinic.

489

490

491 **FINAL STATISTICAL ANALYSIS PLAN**

492

493 **Statistics**

494 We included children with at least one anthropometric measurement at age 0-6 years.

495 The effects of high-dose vitamin D supplementation on birth weight, size for gestational age and z-scores of BMI, height and weight at age 6 years ( $\pm$  6 months) were analysed using Student's test.

496 The effects on the longitudinal assessments of z-scored length/height, weight, and BMI and waist, thorax- and head circumference from age 1 week to 6 years (up to 12 assessments per child) were analysed in a random intercept mixed effects model.

500

501 Non-normalised data were adjusted for age and sex. DXA scan data on BMC, lean soft tissue mass and fat mass at age 3 and 6 years were analysed using a multivariate linear regression model adjusted for age, sex, height and weight. The effect of the vitamin D intervention on BMC and bone mineral density (BMD) outcomes combined for both ages was analysed in a random intercept mixed effects model. The effects on childhood growth and bone mineralization were also analyzed stratified by maternal pre-supplementation 25(OH)D levels (insufficient vs. sufficient), season of birth (winter (December to February), spring (March to May), summer (June to August) and fall (September to November)), and as low vs. high season based on 25(OH)D levels. The baseline (week 24 of gestation) levels of 25(OH)D were investigated for seasonality with the season package in R for sinusoidal (parametric) seasonal pattern with one season cycle per year based on the day in year of sampling. From these high vs low level was derived. The analysis was based on Peter Baker, A. B. Seasonal Analysis of Health Data Package 'season' v. 0.3.8. (2018).

513

514 The effect on the post-hoc defined endpoint of fractures was analyzed by a Poisson regression model taking repeated measurements into account. Statistical analyses were performed with the software package R (Version 3.4.1) with  $p < 0.05$  considered indicative of significance. No imputation was performed for missing data.

518

519 **SUMMARY OF CHANGES**

520 Anthropometrics, 25(OH)D, seasonality and DXA scans through age 6 years and the combined mixed-effects model analyses were added to the original statistical analysis plan.

522

523

524
