# Supplementary material
Source: PubMed Central journal article supplement (PMC7042912)
Supplement: jamapediatr-174-419-s003.pdf [file jamapediatr-174-419-s003.pdf]

## Data Sharing Statement

Brustad. Effect of High-Dose vs Standard-Dose Vitamin D Supplementation in Pregnancy on Bone Mineralization in Offspring Until Age 6 Years. *JAMA Pediatr*. Published February 24, 2020. 10.1001/jamapediatrics.2019.6083

### Data

**Data available:** Yes

**Data types:** Deidentified participant data

**How to access data:** Data will be available on request by email to corresponding author Hans Bisgaard [bisgaard@copsac.com](mailto:bisgaard@copsac.com)

**When available:** With publication

### Supporting Documents

**Document types:** None

### Additional Information

**Who can access the data:** Researchers whose proposed use of the data has been approved

**Types of analyses:** For any purpose

**Mechanisms of data availability:** With a signed data access agreement
